# Supplementary material
Source: PubMed Central journal article supplement (PMC3448092)
Supplement: Supp_Data.pdf [file Supp_Data.pdf]

## Supplementary Data

SUPPLEMENTARY TABLE 1. THERAPEUTIC HISTORY OF THE STUDY POPULATION

|                                                                 | Overall non-B | C         | F         | AG        | p value <sup>a</sup> | B            | p value <sup>b</sup> |          |         |
|-----------------------------------------------------------------|---------------|-----------|-----------|-----------|----------------------|--------------|----------------------|----------|---------|
|                                                                 |               |           |           |           |                      |              | C vs. B              | AG vs. B | F vs. B |
| Number of patients                                              | 189           | 45        | 47        | 36        |                      | 1042         |                      |          |         |
| NRTI-treated patients with experience with, <sup>c</sup> N (%)  | 179 (94.7)    | 44 (97.8) | 44 (93.6) | 32 (88.9) |                      | 1042 (100.0) |                      |          |         |
| 3TC                                                             | 154 (86)      | 39 (88.6) | 41 (93.2) | 27 (84.4) |                      | 980 (94)     |                      | 0.03     |         |
| FTC                                                             | 40 (22.3)     | 13 (29.5) | 10 (22.7) | 6 (18.8)  |                      | 156 (15.0)   | 0.009                |          |         |
| TA (AZT/d4T)                                                    | 152 (98.7)    | 36 (81.8) | 41 (93.2) | 28 (87.5) |                      | 984 (94.4)   | 0.0006               |          |         |
| ABC                                                             | 32 (17.9)     | 4 (9.1)   | 12 (27.3) | 5 (15.6)  | 0.08                 | 272 (26.1)   | 0.01                 |          |         |
| Non-TA (ddI/TDF)                                                | 134 (74.9)    | 35 (77.8) | 39 (88.6) | 17 (53.1) | 0.001                | 734 (70.4)   |                      | 0.04     | 0.07    |
| NNRTI-treated patients with experience with, <sup>c</sup> N (%) | 81 (42.9)     | 20 (44.4) | 23 (48.9) | 10 (27.8) |                      | 335 (32.1)   |                      |          |         |
| NVP                                                             | 34 (41.5)     | 14 (70)   | 8 (33.3)  | 6 (60)    | 0.06                 | 199 (59.4)   |                      |          | 0.02    |
| EFV                                                             | 62 (75.6)     | 12 (60)   | 20 (83.3) | 6 (60)    |                      | 208 (62.1)   |                      |          | 0.01    |
| PI-treated patients with experience with, <sup>c</sup> N (%)    | 131 (69.3)    | 32 (71.1) | 39 (83)   | 27 (75)   |                      | 612 (58.7)   |                      |          |         |
| ATV                                                             | 35 (26.1)     | 10 (30.3) | 9 (23.1)  | 5 (18.5)  |                      | 126 (20.6)   |                      |          |         |
| IDV                                                             | 45 (34.3)     | 6 (18.2)  | 20 (51.3) | 6 (22.2)  | 0.005                | 324 (52.9)   | 0.0002               | 0.002    |         |
| LPV                                                             | 85 (63.4)     | 21 (63.6) | 27 (69.2) | 13 (48.1) |                      | 349 (57.0)   |                      |          |         |
| NFV                                                             | 49 (36.6)     | 13 (39.4) | 15 (38.5) | 10 (37)   |                      | 326 (53.3)   |                      |          | 0.07    |
| SQV                                                             | 26 (19.4)     | 6 (18.2)  | 14 (35.9) | 1 (3.7)   | 0.007                | 189 (30.9)   |                      | 0.002    |         |

<sup>a</sup>Differences in the prevalence of patients with the same drug experience among the three non-B subtypes were assessed by the Chi square test (2×3 table). Only significant *p* values (*p*<0.05) are reported.

<sup>b</sup>Differences in the prevalence of patients with the same drug experience between non-B subtypes and B subtype were assessed by the Fisher exact test. Only significant *p* values (*p*<0.05) are reported.

<sup>c</sup>Only the proportions of patients with experience to each drug >5% are shown.

3TC, lamivudine; ABC, abacavir; ATV, atazanavir; AG, CRF02\_AG; AZT, zidovudine; ddI, didanosine; d4T, stavudine; EFV, efavirenz; FTC, emtricitabine; IDV, indinavir; LPV, lopinavir; NFV, nelfinavir; N, number of patients; NNRTI, nonnucleoside reverse transcriptase inhibitors; NRTI, nucleoside reverse transcriptase inhibitors; NVP, nevirapine; PI, protease inhibitors; SQV, saquinavir; TA, thymidine analogs; TDF, tenofovir.
